# Supplementary material for: Wild Birds in Live Birds Markets: Potential Reservoirs of Enzootic Avian Influenza Viruses and Antimicrobial Resistant Enterobacteriaceae in Northern Egypt
Source: PubMed Central journal article supplement (PMC7157678; doi:10.3390/pathogens9030196), 2020-03-06

**Supplementary Table 1: List of samples information.**

| Serial | Date of sampling | Cities   | Birds Common name (Scientific name)           | health status | AIV  | Salmonella    | E.coli           | enterobacteriaceae       |
|--------|------------------|----------|-----------------------------------------------|---------------|------|---------------|------------------|--------------------------|
| 1      | 30/12/018        | Gamasa   | Northern Northern shoveler (Spatula clypeata) | Diarrhea      | H5N8 | Kentucky      | -                | Proteus mirabilis        |
| 2      | 30/12/018        | Gamasa   | Northern Northern shoveler (Spatula clypeata) | Diarrhea      | H5N8 | -             | -                | Proteus vulgaris         |
| 3      | 30/12/018        | Gamasa   | Northern Northern shoveler (Spatula clypeata) | Diarrhea      | H5N8 | <u>Molade</u> | <u>O91 : H21</u> | -                        |
| 4      | 30/12/018        | Gamasa   | Northern Northern shoveler (Spatula clypeata) | Diarrhea      | H9N2 | -             | -                | Proteus mirabilis        |
| 5      | 30/12/018        | Gamasa   | Northern Northern shoveler (Spatula clypeata) | Diarrhea      | H9N2 | -             | O128 : H2        | Providencia rettgeri     |
| 6      | 30/12/018        | Gamasa   | Northern Northern shoveler (Spatula clypeata) | Diarrhea      | H9N2 | -             | O1 : H7          | Enterobacter aerogenes   |
| 7      | 30/12/018        | Gamasa   | Northern Northern shoveler (Spatula clypeata) | Diarrhea      | -    | -             | -                | Enterobacter agglomerans |
| 8      | 30/12/018        | Gamasa   | Northern Northern shoveler (Spatula clypeata) | Diarrhea      | H5N8 | -             | -                | Proteus vulgaris         |
| 9      | 30/12/018        | Gamasa   | Northern Northern shoveler (Spatula clypeata) | Diarrhea      | H9N2 | -             | O78              | Serratia liquefaciens    |
| 10     | 30/12/018        | Gamasa   | Northern Northern shoveler (Spatula clypeata) | Diarrhea      | H6N2 | -             | -                | Enterobacter aerogenes   |
| 11     | 30/12/018        | Gamasa   | Northern Northern shoveler (Spatula clypeata) | Diarrhea      | -    | -             | -                | Enterobacter aerogenes   |
| 12     | 30/12/018        | Gamasa   | Northern Northern shoveler (Spatula clypeata) | Diarrhea      | -    | -             | -                | Proteus mirabilis        |
| 13     | 31/12/018        | Damietta | Northern Northern shoveler (Spatula clypeata) | Diarrhea      | -    | -             | -                | Hafnia species           |
| 14     | 31/12/018        | Damietta | Northern Northern shoveler (Spatula clypeata) | Diarrhea      | -    | -             | O146 : H21       | Providencia rettgeri     |
| 15     | 31/12/018        | Damietta | Northern Northern shoveler (Spatula clypeata) | Diarrhea      | -    | -             | -                | Citrobacter freundii     |
| 16     | 31/12/018        | Damietta | Northern Northern shoveler (Spatula clypeata) | Diarrhea      | -    | -             | O1 : H7          | Proteus mirabilis        |
| 17     | 31/12/018        | Damietta | Northern Northern shoveler (Spatula clypeata) | Diarrhea      | -    | -             | O158             | Proteus mirabilis        |

|    |           |          |                                               |          |   |                    |                 |                          |
|----|-----------|----------|-----------------------------------------------|----------|---|--------------------|-----------------|--------------------------|
| 18 | 31/12/018 | Damietta | Northern Northern shoveler (Spatula clypeata) | Diarrhea | - | -                  | O153 : H2       | -                        |
| 19 | 31/12/018 | Damietta | Northern Northern shoveler (Spatula clypeata) | Diarrhea | - | -                  | -               | Enterobacter agglomerans |
| 20 | 31/12/018 | Damietta | Northern Northern shoveler (Spatula clypeata) | Diarrhea | - | -                  | -               | Proteus mirabilis        |
| 21 | 31/12/018 | Damietta | Northern Northern shoveler (Spatula clypeata) | Diarrhea | - | -                  | O2: H6          | Enterobacter aerogenes   |
| 22 | 31/12/018 | Damietta | Northern Northern shoveler (Spatula clypeata) | Diarrhea | - | -                  | -               | Proteus mirabilis        |
| 23 | 31/12/018 | Damietta | Northern Northern shoveler (Spatula clypeata) | Diarrhea | - | -                  | O128 : H2       | Serratia liquefaciens    |
| 24 | 3/1/019   | Damietta | Northern Northern shoveler (Spatula clypeata) | healthy  | - | -                  | -               | Klebsiella pneumoniae    |
| 25 | 3/1/019   | Damietta | Northern Northern shoveler (Spatula clypeata) | healthy  | - | Enteritidis        | -               | Proteus mirabilis        |
| 26 | 3/1/019   | Damietta | Northern Northern shoveler (Spatula clypeata) | healthy  | - | Papua              | -               | Klebsiella pneumoniae    |
| 27 | 3/1/019   | Damietta | Northern Northern shoveler (Spatula clypeata) | healthy  | - | -                  | O121 : H7       | Citrobacter diversus     |
| 28 | 3/2/019   | Damietta | Northern Northern shoveler (Spatula clypeata) | healthy  | - | Kentucky           | -               | Enterobacter aerogenes   |
| 29 | 3/2/019   | Damietta | Northern Northern shoveler (Spatula clypeata) | healthy  | - | <u>Kentucky</u>    | <u>O78</u>      | Proteus mirabilis        |
| 30 | 3/2/019   | Damietta | Northern Northern shoveler (Spatula clypeata) | healthy  | - | <u>Typhimurium</u> | <u>O78</u>      | -                        |
| 31 | 3/2/019   | Damietta | Northern Northern shoveler (Spatula clypeata) | healthy  | - | Larochelle         | -               | Providencia rettgeri     |
| 32 | 3/2/019   | Damietta | Northern Northern shoveler (Spatula clypeata) | healthy  | - | Enteritidis        | -               | Citrobacter freundii     |
| 33 | 9/12/018  | Damietta | Common pochard (Aythyaferina)                 | Diarrhea | - | -                  | -               | Enterobacter aerogenes   |
| 34 | 9/12/018  | Damietta | Common pochard (Aythyaferina)                 | Diarrhea | - | <u>Tamale</u>      | <u>O55 : H7</u> | Proteus mirabilis        |
| 35 | 30/12/018 | Gamasa   | Common pochard (Aythyaferina)                 | Diarrhea | - | Infantis           | -               | Enterobacter agglomerans |
| 36 | 30/12/018 | Gamasa   | Common pochard (Aythyaferina)                 | Diarrhea | - | -                  | -               | Mixed Culture            |
| 37 | 30/12/018 | Gamasa   | Common pochard (Aythyaferina)                 | Diarrhea | - | -                  | -               | Citrobacter freundii     |
| 38 | 30/12/018 | Gamasa   | Common pochard (Aythyaferina)                 | Diarrhea | - | -                  | -               | Proteus mirabilis        |

|    |           |          |                               |          |   |   |               |                          |
|----|-----------|----------|-------------------------------|----------|---|---|---------------|--------------------------|
| 39 | 30/12/018 | Gamasa   | Common pochard (Aythyaferina) | Diarrhea | - | - | O78           | Proteus vulgaris         |
| 40 | 30/12/018 | Gamasa   | Common pochard (Aythyaferina) | Diarrhea | - | - | -             | Enterobacter aerogenes   |
| 41 | 30/12/018 | Gamasa   | Common pochard (Aythyaferina) | Diarrhea | - | - | O78           | Proteus vulgaris         |
| 42 | 30/12/018 | Gamasa   | Common pochard (Aythyaferina) | Diarrhea | - | - | O158          | Enterobacter aerogenes   |
| 43 | 30/12/018 | Gamasa   | Common pochard (Aythyaferina) | Diarrhea | - | - | O125 :<br>H21 | Proteus mirabilis        |
| 44 | 20/1/019  | Damietta | Common pochard (Aythyaferina) | healthy  | - | - | -             | Enterobacter agglomerans |
| 45 | 20/1/019  | Damietta | Common pochard (Aythyaferina) | healthy  | - | - | -             | Providencia rettgeri     |
| 46 | 20/1/019  | Damietta | Common pochard (Aythyaferina) | healthy  | - | - | -             | Citrobacter freundii     |
| 47 | 20/1/019  | Damietta | Common pochard (Aythyaferina) | healthy  | - | - | -             | Citrobacter diversus     |
| 48 | 20/1/019  | Damietta | Common pochard (Aythyaferina) | healthy  | - | - | O2: H6        | Proteus mirabilis        |
| 49 | 9/12/018  | Gamasa   | Northern pintail (Anas Acuta) | Diarrhea | - | - | -             | Providencia rettgeri     |
| 50 | 9/12/018  | Gamasa   | Northern pintail (Anas Acuta) | Diarrhea | - | - | -             | Hafnia species           |
| 51 | 23/12/018 | Damietta | Northern pintail (Anas Acuta) | healthy  | - | - | -             | Klebsiella pneumoniae    |
| 52 | 25/12/018 | Damietta | Northern pintail (Anas Acuta) | healthy  | - | - | O121 : H7     | Enterobacter aerogenes   |
| 53 | 25/12/018 | Damietta | Northern pintail (Anas Acuta) | healthy  | - | - | -             | Providencia rettgeri     |
| 54 | 25/12/018 | Damietta | Northern pintail (Anas Acuta) | healthy  | - | - | O91 : H21     | Proteus mirabilis        |
| 55 | 25/12/018 | Damietta | Northern pintail (Anas Acuta) | healthy  | - | - | -             | Citrobacter freundii     |
| 56 | 30/12/018 | Gamasa   | Northern pintail (Anas Acuta) | Diarrhea | - | - | -             | Enterobacter aerogenes   |
| 57 | 30/12/018 | Gamasa   | Northern pintail (Anas Acuta) | Diarrhea | - | - | O55 : H7      | Proteus vulgaris         |
| 58 | 30/12/018 | Gamasa   | Northern pintail (Anas Acuta) | Diarrhea | - | - | O113 : H4     | Mixed Culture            |
| 59 | 30/12/018 | Gamasa   | Northern pintail (Anas Acuta) | Diarrhea | - | - | -             | Proteus mirabilis        |
| 60 | 30/12/018 | Gamasa   | Northern pintail (Anas Acuta) | Diarrhea | - | - | O78           | Proteus mirabilis        |
| 61 | 30/12/018 | Gamasa   | Northern pintail (Anas Acuta) | Diarrhea | - | - | -             | Enterobacter aerogenes   |
| 62 | 30/12/018 | Gamasa   | Northern pintail (Anas Acuta) | Diarrhea | - | - | -             | Proteus mirabilis        |
| 63 | 30/12/018 | Gamasa   | Northern pintail (Anas Acuta) | Diarrhea | - | - | O2: H6        | Serratia liquefaciens    |
| 64 | 30/12/018 | Gamasa   | Northern pintail (Anas Acuta) | Diarrhea | - | - | -             | Hafnia species           |
| 65 | 31/12/018 | Damietta | Northern pintail (Anas Acuta) | healthy  | - | - | -             | Citrobacter freundii     |
| 66 | 31/12/018 | Damietta | Northern pintail (Anas Acuta) | healthy  | - | - | -             | Proteus mirabilis        |

|    |           |          |                               |          |   |                 |                |                          |
|----|-----------|----------|-------------------------------|----------|---|-----------------|----------------|--------------------------|
| 67 | 31/12/018 | Damietta | Northern pintail (Anas Acuta) | healthy  | - | <u>Molade</u>   | <u>O1 : H7</u> | Mixed Culture            |
| 68 | 31/12/018 | Damietta | Northern pintail (Anas Acuta) | healthy  | - | Wingrove        | -              | Enterobacter aerogenes   |
| 69 | 31/12/018 | Damietta | Northern pintail (Anas Acuta) | healthy  | - | <u>Kentucky</u> | <u>O158</u>    | Klebsiella pneumoniae    |
| 70 | 31/12/018 | Damietta | Northern pintail (Anas Acuta) | healthy  | - | -               | O91 : H21      | Proteus mirabilis        |
| 71 | 31/12/018 | Damietta | Northern pintail (Anas Acuta) | healthy  | - | -               | -              | Mixed Culture            |
| 72 | 31/12/018 | Damietta | Northern pintail (Anas Acuta) | healthy  | - | -               | -              | Citrobacter diversus     |
| 73 | 3/1/019   | Damietta | Northern pintail (Anas Acuta) | healthy  | - | -               | -              | Enterobacter cloacae     |
| 74 | 3/1/019   | Damietta | Northern pintail (Anas Acuta) | healthy  | - | -               | -              | Proteus vulgaris         |
| 75 | 3/1/019   | Damietta | Northern pintail (Anas Acuta) | healthy  | - | -               | O2: H6         | Proteus vulgaris         |
| 76 | 3/1/019   | Damietta | Northern pintail (Anas Acuta) | healthy  | - | -               | -              | Klebsiella pneumoniae    |
| 77 | 3/1/019   | Damietta | Northern pintail (Anas Acuta) | healthy  | - | -               | O128 : H2      | Serratia liquefaciens    |
| 78 | 3/1/019   | Damietta | Northern pintail (Anas Acuta) | healthy  | - | -               | -              | Providencia rettgeri     |
| 79 | 20/1/019  | Damietta | Northern pintail (Anas Acuta) | healthy  | - | -               | -              | Enterobacter aerogenes   |
| 80 | 20/1/019  | Damietta | Northern pintail (Anas Acuta) | healthy  | - | -               | -              | Citrobacter freundii     |
| 81 | 20/1/019  | Damietta | Northern pintail (Anas Acuta) | healthy  | - | -               | O2: H6         | Proteus vulgaris         |
| 82 | 9/12/018  | Gamasa   | common teal (Anas crecca)     | Diarrhea | - | -               | -              | Proteus mirabilis        |
| 83 | 9/12/018  | Gamasa   | common teal (Anas crecca)     | Diarrhea | - | -               | O44 : H18      | Enterobacter aerogenes   |
| 84 | 31/12/018 | Damietta | common teal (Anas crecca)     | healthy  | - | -               | O78            | Proteus mirabilis        |
| 85 | 31/12/018 | Damietta | common teal (Anas crecca)     | healthy  | - | -               | O128 : H2      | Serratia liquefaciens    |
| 86 | 31/12/018 | Damietta | common teal (Anas crecca)     | healthy  | - | -               | -              | Klebsiella ozaenae       |
| 87 | 31/12/018 | Damietta | common teal (Anas crecca)     | healthy  | - | -               | -              | Hafnia species           |
| 88 | 31/12/018 | Damietta | common teal (Anas crecca)     | healthy  | - | -               | -              | Mixed Culture            |
| 89 | 31/12/018 | Damietta | common teal (Anas crecca)     | healthy  | - | -               | O78            | Proteus vulgaris         |
| 90 | 31/12/018 | Damietta | common teal (Anas crecca)     | healthy  | - | -               | O26 : H11      | Enterobacter aerogenes   |
| 91 | 31/12/018 | Damietta | common teal (Anas crecca)     | healthy  | - | -               | -              | Proteus mirabilis        |
| 92 | 31/12/018 | Damietta | common teal (Anas crecca)     | healthy  | - | -               | O124           | Citrobacter diversus     |
| 93 | 31/12/018 | Damietta | common teal (Anas crecca)     | healthy  | - | -               | -              | Enterobacter agglomerans |
| 94 | 31/12/018 | Damietta | common teal (Anas crecca)     | healthy  | - | -               | -              | Citrobacter freundii     |
| 95 | 31/12/018 | Damietta | common teal (Anas crecca)     | healthy  | - | -               | O1 : H7        | Providencia rettgeri     |

|     |           |          |                                            |          |   |         |            |                                 |
|-----|-----------|----------|--------------------------------------------|----------|---|---------|------------|---------------------------------|
| 96  | 20/1/019  | Damietta | common teal ( <i>Anas crecca</i> )         | healthy  | - | -       | -          | <i>Citrobacter freundii</i>     |
| 97  | 20/1/019  | Damietta | common teal ( <i>Anas crecca</i> )         | healthy  | - | -       | O146 : H21 | <i>Enterobacter aerogenes</i>   |
| 98  | 20/1/019  | Damietta | common teal ( <i>Anas crecca</i> )         | healthy  | - | -       | -          | Mixed Culture                   |
| 99  | 20/1/019  | Damietta | common teal ( <i>Anas crecca</i> )         | healthy  | - | -       | -          | <i>Proteus mirabilis</i>        |
| 100 | 20/1/019  | Damietta | common teal ( <i>Anas crecca</i> )         | healthy  | - | -       | -          | <i>Providencia rettgeri</i>     |
| 101 | 25/12/018 | Damietta | moorhen ( <i>Gallinulachloropus</i> )      | healthy  | - | -       | -          | <i>Enterobacter agglomerans</i> |
| 102 | 25/12/018 | Damietta | moorhen ( <i>Gallinulachloropus</i> )      | healthy  | - | -       | O121 : H7  | <i>Proteus mirabilis</i>        |
| 103 | 31/12/018 | Damietta | moorhen ( <i>Gallinulachloropus</i> )      | healthy  | - | untyped | O2: H6     | <i>Enterobacter aerogenes</i>   |
| 104 | 31/12/018 | Damietta | moorhen ( <i>Gallinulachloropus</i> )      | healthy  | - | -       | -          | Mixed Culture                   |
| 105 | 31/12/018 | Damietta | moorhen ( <i>Gallinulachloropus</i> )      | healthy  | - | Papua   | -          | <i>Proteus mirabilis</i>        |
| 106 | 31/12/018 | Damietta | moorhen ( <i>Gallinulachloropus</i> )      | healthy  | - | -       | O26 : H11  | <i>Serratia liquefaciens</i>    |
| 107 | 31/12/018 | Damietta | moorhen ( <i>Gallinulachloropus</i> )      | healthy  | - | -       | -          | <i>Enterobacter aerogenes</i>   |
| 108 | 31/12/018 | Damietta | moorhen ( <i>Gallinulachloropus</i> )      | healthy  | - | -       | -          | <i>Hafnia species</i>           |
| 109 | 31/12/018 | Damietta | moorhen ( <i>Gallinulachloropus</i> )      | healthy  | - | -       | -          | <i>Enterobacter aerogenes</i>   |
| 110 | 31/12/018 | Damietta | moorhen ( <i>Gallinulachloropus</i> )      | healthy  | - | -       | -          | <i>Serratia liquefaciens</i>    |
| 111 | 31/12/018 | Damietta | moorhen ( <i>Gallinulachloropus</i> )      | healthy  | - | -       | O91 : H21  | <i>Citrobacter freundii</i>     |
| 112 | 31/12/018 | Damietta | moorhen ( <i>Gallinulachloropus</i> )      | healthy  | - | -       | O78        | <i>Proteus mirabilis</i>        |
| 113 | 31/12/018 | Damietta | moorhen ( <i>Gallinulachloropus</i> )      | healthy  | - | -       | -          | <i>Enterobacter agglomerans</i> |
| 114 | 31/12/018 | Damietta | moorhen ( <i>Gallinulachloropus</i> )      | healthy  | - | -       | -          | <i>Providencia rettgeri</i>     |
| 115 | 31/12/018 | Damietta | moorhen ( <i>Gallinulachloropus</i> )      | healthy  | - | -       | -          | <i>Klebsiella pneumoniae</i>    |
| 116 | 31/12/018 | Damietta | moorhen ( <i>Gallinulachloropus</i> )      | healthy  | - | -       | -          | <i>Proteus mirabilis</i>        |
| 117 | 31/12/018 | Damietta | moorhen ( <i>Gallinulachloropus</i> )      | healthy  | - | -       | O121 : H7  | <i>Citrobacter freundii</i>     |
| 118 | 31/12/018 | Damietta | moorhen ( <i>Gallinulachloropus</i> )      | healthy  | - | -       | -          | <i>Enterobacter aerogenes</i>   |
| 119 | 31/12/018 | Damietta | mallard ducks( <i>Anas Platyrhynchos</i> ) | Diarrhea | - | -       | -          | <i>Providencia rettgeri</i>     |
| 120 | 31/12/018 | Damietta | mallard ducks( <i>Anas Platyrhynchos</i> ) | Diarrhea | - | -       | O26 : H11  | <i>Proteus vulgaris</i>         |
| 121 | 31/12/018 | Damietta | mallard ducks( <i>Anas Platyrhynchos</i> ) | Diarrhea | - | -       | -          | <i>Serratia liquefaciens</i>    |

|     |           |          |                                       |         |   |             |            |                          |
|-----|-----------|----------|---------------------------------------|---------|---|-------------|------------|--------------------------|
| 122 | 31/12/018 | Damietta | PurpleSwamphens (Porphyrioporphyrrio) | healthy | - | -           | O1 : H7    | Mixed Culture            |
| 123 | 31/12/018 | Damietta | PurpleSwamphens (Porphyrioporphyrrio) | healthy | - | -           | -          | Klebsiella pneumoniae    |
| 124 | 9/12/018  | Damietta | Garganey (Spatula querquedula)        | healthy | - | -           | -          | Enterobacter agglomerans |
| 125 | 9/12/018  | Damietta | Garganey (Spatula querquedula)        | healthy | - | -           | O146 : H21 | Hafnia species           |
| 126 | 3/2/019   | Damietta | Garganey (Spatula querquedula)        | healthy | - | -           | O158       | Proteus mirabilis        |
| 127 | 3/2/019   | Damietta | Garganey (Spatula querquedula)        | healthy | - | -           | -          | Enterobacter aerogenes   |
| 128 | 24/2/019  | Damietta | Garganey (Spatula querquedula)        | healthy | - | Tamale      | -          | Enterobacter aerogenes   |
| 129 | 24/2/019  | Damietta | Garganey (Spatula querquedula)        | healthy | - | Typhimurium | -          | Enterobacter agglomerans |
| 130 | 24/2/019  | Damietta | Garganey (Spatula querquedula)        | healthy | - | -           | O119 : H6  | Enterobacter aerogenes   |
| 131 | 9/12/018  | Damietta | coot (Fulicaatra)                     | healthy | - | Papua       | -          | Proteus mirabilis        |
| 132 | 9/12/018  | Damietta | coot (Fulicaatra)                     | healthy | - | Labadi      | -          | Enterobacter cloacae     |
| 133 | 3/2/019   | Damietta | Glossy Ibis (Plegadisfalcinellus)     | healthy | - | -           | O78        | Citrobacter freundii     |
| 134 | 3/2/019   | Damietta | Common redshank (Tringatotanus)       | healthy | - | -           | -          | Citrobacter freundii     |
| 135 | 3/2/019   | Damietta | Common redshank (Tringatotanus)       | healthy | - | -           | O2: H6     | Proteus mirabilis        |
| 136 | 24/2/019  | Damietta | Common redshank (Tringatotanus)       | healthy | - | Enteritidis | -          | Citrobacter freundii     |
| 137 | 24/2/019  | Damietta | Common redshank (Tringatotanus)       | healthy | - | Kentucky    | -          | Enterobacter agglomerans |
| 138 | 24/2/019  | Damietta | Common redshank (Tringatotanus)       | healthy | - | -           | O125 : H21 | Proteus mirabilis        |
| 139 | 24/2/019  | Damietta | Common redshank (Tringatotanus)       | healthy | - | -           | -          | Hafnia species           |
| 140 | 24/2/019  | Damietta | Common redshank (Tringatotanus)       | healthy | - | Tsevie      | -          | Citrobacter freundii     |
| 141 | 24/2/019  | Damietta | Common Quail (Coturnix coturnix)      | healthy | - | Molade      | -          | Enterobacter aerogenes   |
| 142 | 24/2/019  | Damietta | Common Quail (Coturnix coturnix)      | healthy | - | Typhimurium | O128 : H2  | Mixed Culture            |

|     |          |          |                                               |         |   |             |          |                        |
|-----|----------|----------|-----------------------------------------------|---------|---|-------------|----------|------------------------|
| 143 | 24/2/019 | Damietta | Common Quail (Coturnix coturnix)              | healthy | - | Enteritidis | -        | Klebsiella pneumoniae  |
| 144 | 24/2/019 | Damietta | Ruff (PhilomachusPugnax)                      | healthy |   | Inganda     | O55 : H7 | Proteus mirabilis      |
| 145 | 24/2/019 | Damietta | Ruff (PhilomachusPugnax)                      | healthy | - | -           | -        | Proteus mirabilis      |
| 146 | 24/2/019 | Damietta | Spur-winged Plover (Vanellus spinosus)        | healthy | - | Kentucky    | -        | Enterobacter aerogenes |
| 147 | 3/2/019  | Damietta | Northern Northern shoveler (Spatula clypeata) | healthy | - | Tsevie      | -        | Mixed Culture          |
| 148 | 3/2/019  | Damietta | Northern Northern shoveler (Spatula clypeata) | healthy | - | Infantis    | -        | Hafnia species         |

Supplementary figure 1: Influenza viruses detection and subtyping using real time and conventional PCR.

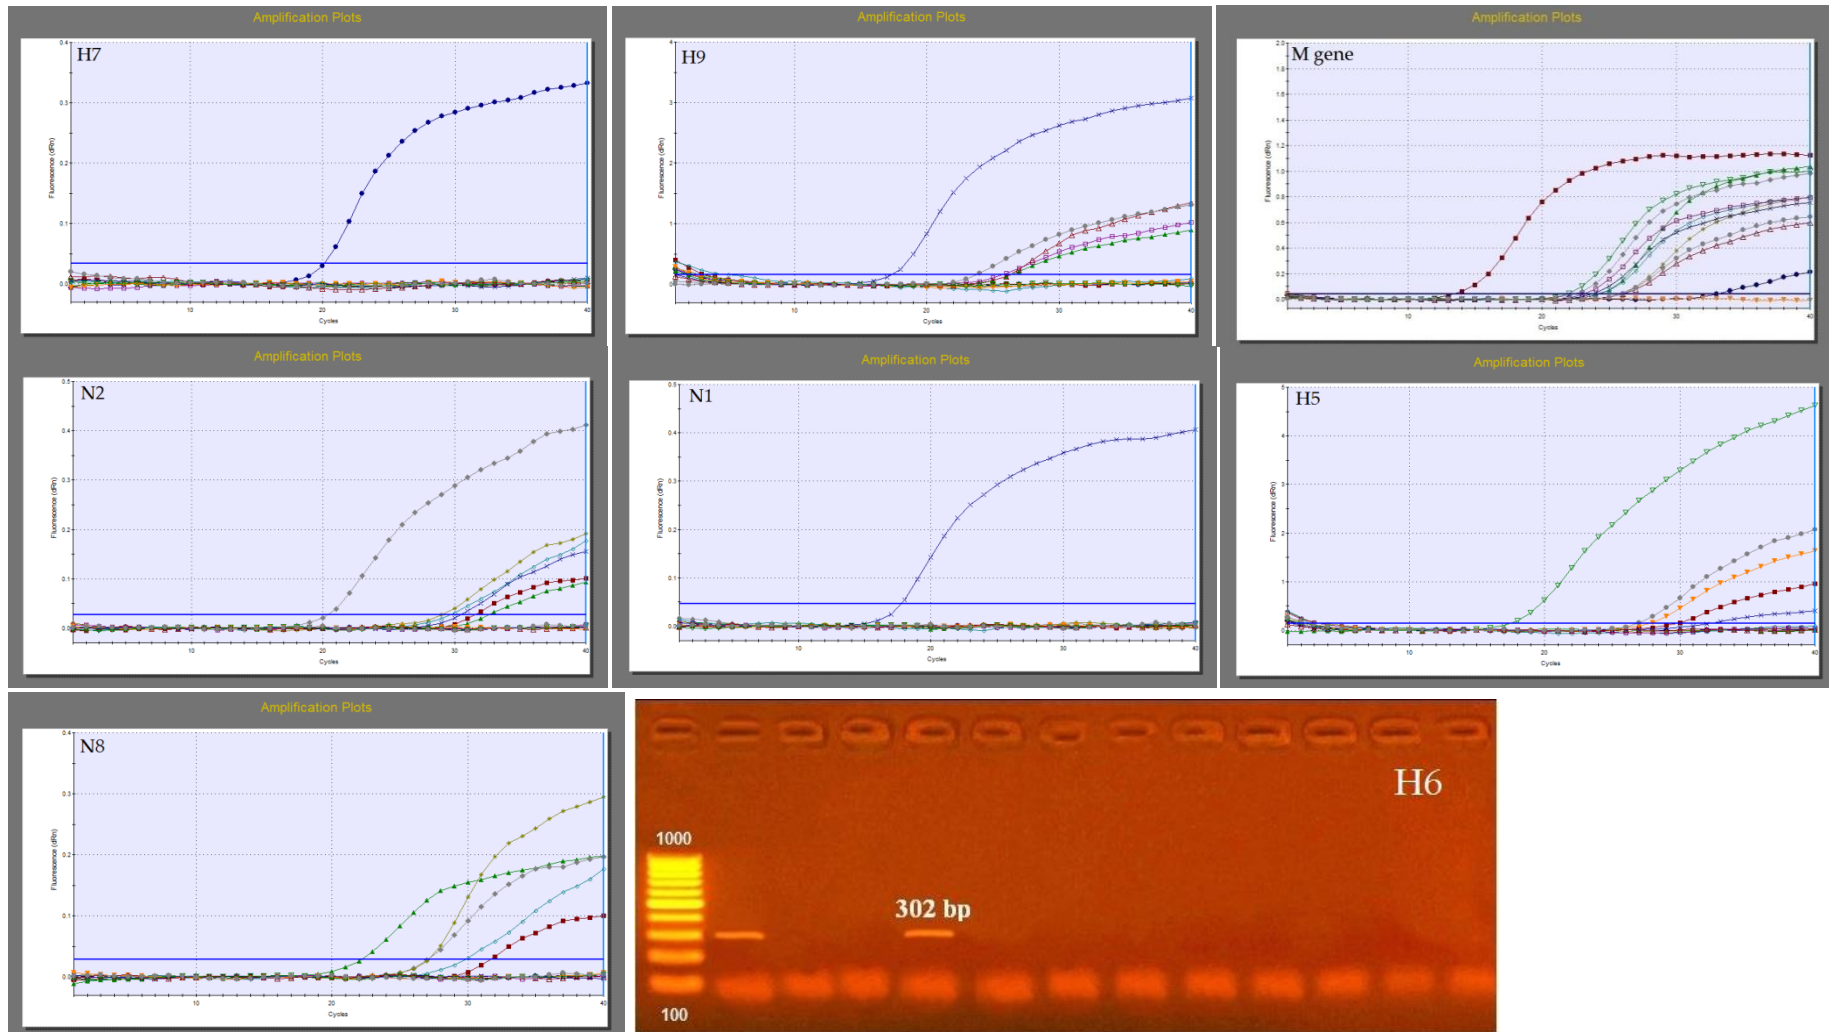

Supplement: pathogens-09-00196-s001.pdf [file pathogens-09-00196-s001.pdf]
